# Supplementary material for: Age and Sex Effects across the Blood Proteome after Lonizing Radiation Exposure: Consequences for Biomarker Screening and Risk Assessment
Source: Research Square preprint supplement (doi:10.21203/rs.3.rs-1069199/v1), 2021-11-30
Supplement: Supplementary file 1 [file 15aa6f431a1522d9a865340e.pdf]

## **Supplemental Methods Information M1**

### **Irradiation procedure**

The animals (5 mice/group) were simultaneously total body irradiated with 0.5 Gy absorbed dose to water using a Varian linear accelerator with 15 MV nominal photon energy (Varian Medical Systems, Palo Alto, CA, USA). All irradiations were performed between 5.00 pm and 5.50 pm. The mice were placed in a polystyrene box. The box was covered with 15 mm water-equivalent bolus material. Thus, the mice were positioned at the dose maximum of the beam in the isocenter (1000 mm). A 250×250 mm<sup>2</sup> photon field was employed during the irradiations. The exposure time for dose delivery was 5 seconds. The mice were placed closely together in the polystyrene box to avoid air gaps and to obtain a relatively uniform absorbed dose distribution in each mouse.

### **Sample Preparation for Proteomic Analysis**

For the group-wise pooled quantitation analysis (analysis 1), the representative pooled samples for each group were prepared by mixing equal volumes of plasma from each sample in the respective groups; the global pooled reference sample was prepared by mixing equal volumes from all samples. The reference pooled sample for the non-pooled individual analysis (analysis 2) was prepared by mixing equal volumes from the sample that belonged to the respective groups.

An aliquot of 5.3 µl from each group-wise pooled sample and the global reference sample (analysis 1), or from each individual sample and reference sample (analysis 2), was immunodepleted using the Seppro® mouse spin column kit (SEP110; Sigma-Aldrich; St Louis, MO, USA) according to the manufacturer's instruction. Briefly, the plasma samples were loaded onto the spin column in dilution buffer, incubated at room temperature with shaking for 15 min, the depleted sample (eluate 1) was eluted from the spin columns by centrifugation at 2,000 rpm, and the spin columns were washed with 500 µl of dilution buffer (eluate 2), the eluates were combined to yield the depleted sample. Subsequently, the samples were processed according to the modified filter-aided sample preparation (FASP) method (1). In short, the depleted samples were reduced by DL-dithiothreitol (DTT) at the final concentration of 100 mM, reduced samples were diluted 1:4 by volume with 8 M urea, transferred onto the Nanosep 30k Omega filters (Pall Corporation, Ann Arbor, MI) and

washed 2 times with 200 µl of 8 M urea. Alkylation of the reduced cysteine side chains was performed with 10 mM methyl methanethiosulfonate (MMTS) diluted in digestion buffer (1% sodium deoxycholate (SDC), 50 mM TEAB) for 30 min at room temperature and the filters were then repeatedly washed with digestion buffer. Trypsin in digestion buffer was added (500 ng for analysis 1 or 800 ng for analysis 2) and the sample was incubated at 37 °C overnight, then another 500/800 ng portion of trypsin was added followed by the incubation for 2 h (analysis 1) or 3 h (analysis 2). Digested peptides were collected at 10,000 rpm for 20 min, followed by a wash with 20 µl of the digestion buffer and centrifugation at 10,000 rpm for 20 min. In short, the immunodepleted plasma samples were reduced with DL-dithiothreitol, alkylated with methyl methanethiosulfonate, digested with trypsin in presence of 1% sodium deoxycholate. The resulting peptides were labelled using the TMT 10plex™ isobaric reagents according to the manufacturer's instructions (Thermo Scientific), combined into one TMT set, concentrated using vacuum centrifugation and SDC was removed by acidification with 10% trifluoroacetic acid (TFA) and subsequent centrifugation at 13,000 rpm for 10 min.

The combined TMT-labeled samples were fractionated into 40-42 primary fractions by basic-pH reversed-phase chromatography (bRP-LC) using an ÄKTApurifier (Amersham Pharmacia Biotech AB; Uppsala, Sweden) or a Dionex Ultimate 3000 UPLC system (Thermo Fischer Scientific). All separations were performed using a reversed-phase XBridge BEH C18 column (3.5 µm, 3.0 x 150 mm, Waters Corporation) and a gradient from 0 to 90% acetonitrile in 10 mM ammonium formate (pH 10) at 400 µl/min. The primary fractions were pooled into 20 final fractions, evaporated on speedvac and reconstituted in 3% acetonitrile, 0.2% formic acid for analysis.

### **Liquid Chromatography-Mass Spectrometry Analysis**

All samples were analyzed on an Orbitrap Fusion Tribrid mass spectrometer (Thermo Fisher Scientific). For the analysis of the group-wise pooled dataset (analysis 1), the mass spectrometer (MS) was interfaced with an Easy-nLC 1000 liquid chromatography system (Thermo Fisher Scientific); solvent A was 0.2% formic acid (FA) in water and solvent B was 0.2% FA in acetonitrile. Peptides were trapped on an in-house packed 3 cm pre-column, and separated on an analytical column (75 µm x 30 cm, both backed with Reprosil-Pur C18 material, particle size 3 µm, Dr. Maisch) using the linear gradient from 5% to 25% B in 45 min, from 25% to 80% B in 5 min, 80% B for 10 min, at 300 nL/min flow rate. For analysis 2

samples, the MS was interfaced with an Easy-nLC 1200 liquid chromatography system (Thermo Fisher Scientific); solvent A was 0.2% formic acid (FA) in water and solvent B was 0.2% FA in 80% acetonitrile. Peptides were trapped on an Acclaim Pepmap 100 C18 trap column (100  $\mu$ m x 2 cm, particle size 5  $\mu$ m, Thermo Fischer Scientific) or separated on an analytical column (75  $\mu$ m x 30 cm, particle size 3  $\mu$ m, Reprosil-Pur C18, Dr. Maisch) using the linear gradient from 5% to 35% B in 75 min, from 35% to 100% B in 5 min, 100% B for 10 min, at 300 nL/min flow rate.

Precursor MS scans were performed at 120,000 resolution; the most abundant precursors with charges 2 to 7 were selected for fragmentation over the 3 s cycle time, fragmented by collision induced dissociation (CID) at 30% (analysis 1) or 35% (analysis 2) collision energy, and the MS<sup>2</sup> spectra were detected in the ion trap followed by the synchronous isolation of the 5 most abundant MS<sup>2</sup> fragment ions and fragmentation by higher-energy collision dissociation (HCD); the resulting MS<sup>3</sup> spectra were detected in the Orbitrap at 60,000 (analysis 1) or 50,000 (analysis 2) resolution.

## **Data analysis**

### **Data Availability**

The detailed proteomic sample preparation protocol and the LC-MS analysis parameters are described in the Electronic Supplementary Information. The mass spectrometry proteomics data have been deposited to the ProteomeXchange Consortium via the PRIDE partner repository with the dataset identifier PXD015859 (2).

### **Proteomic data analysis**

Peptide and protein identification and quantification were performed using Proteome Discoverer version 1.4 (Thermo Fisher Scientific). The files were searched using Mascot 2.3 or 2.5.1 (Matrix Science; London, United Kingdom) against the SwissProt database with taxonomy *Mus musculus* version 2015/04 (16714 sequences) for analysis 1 and version 2017/11 (16951 sequence) for analysis 2. Trypsin with no missed cleavage was used as a cleavage rule, precursor tolerance was set to 5 ppm and MS<sup>2</sup> fragment tolerance was set to 500 mmu (analysis 1) or 600 mmu (analysis 2). Mono-oxidation on methionine was set as a variable modification, cysteine methylthiolation, TMT-6 label on lysine and peptide N-termini were set as fixed modifications. Percolator was used for the peptide-spectrum match (PSM) validation with the strict false discovery rate (FDR) threshold of 1%.

The TMT reporter ions were identified in the MS<sup>3</sup> HCD spectra with a mass tolerance of 3 mmu, and the resulting reporter abundance values for each sample were normalized on protein median in Proteome Discoverer 1.4

Differential protein abundance between irradiated and respective non-irradiated control groups was expressed as fold change (FC) values by calculating abundance ratios in linear space. All subsequent analyses were performed on filtered data.

## References

1. Wiśniewski JR, Zougman A, Nagaraj N, Mann M. Universal sample preparation method for proteome analysis. *Nat Methods*. 2009;6:359–362.
2. Perez-Riverol Y, Csordas A, Bai J, Bernal-Llinares M, Hewapathirana S, et al. The PRIDE database and related tools and resources in 2019: improving support for quantification data. *Nucleic Acids Res*. 2019;47(D1):D442–D450.

♀

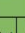

♂

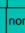

of hydrogen

Panel C. C57BL6N 18-weeks-old ♀

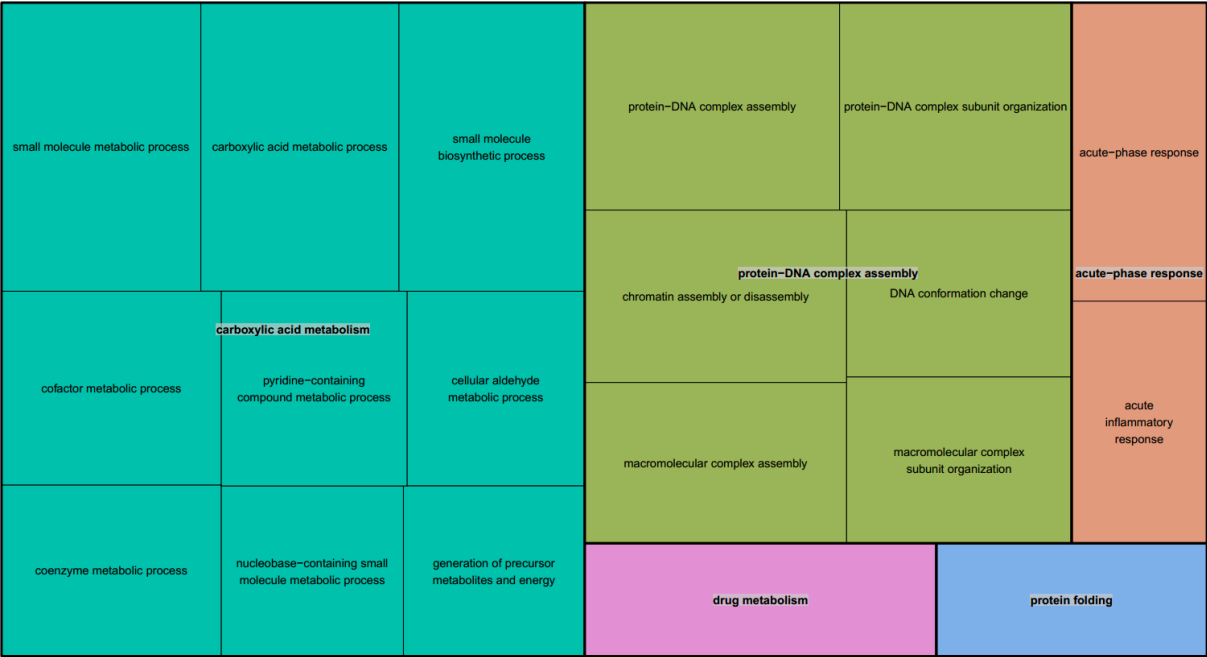

Panel D. C57BL6N 18-weeks-old ♂

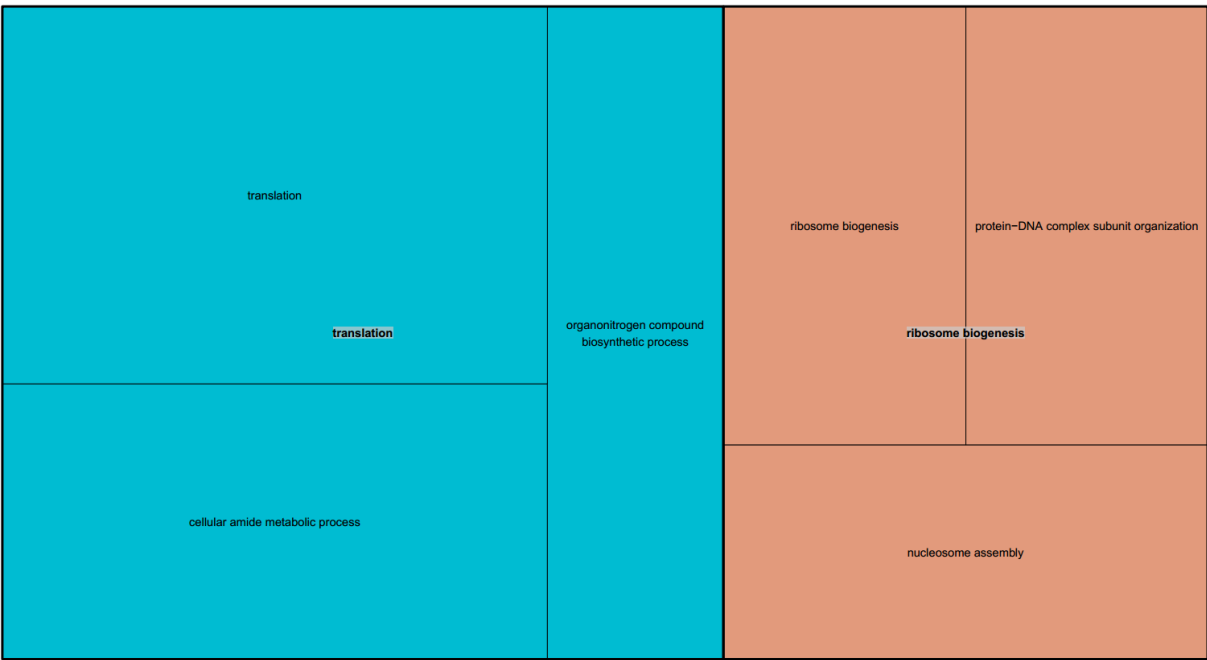

Panel E. BALB/c 7-weeks-old ♀

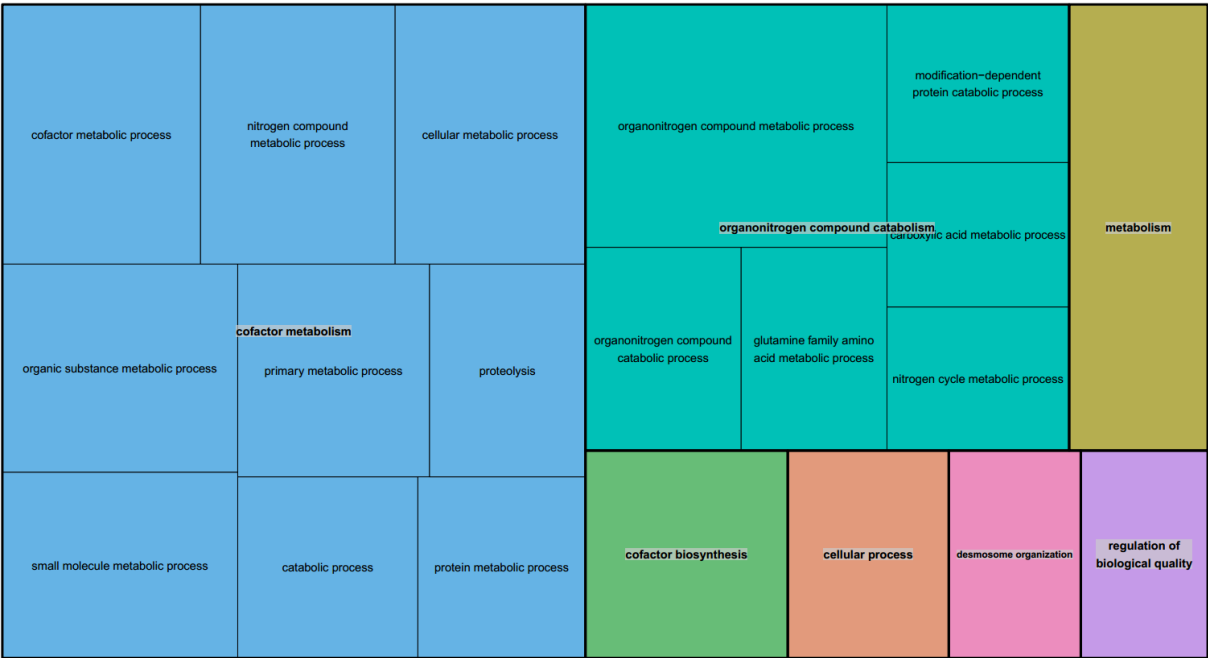

Panel F. BALB/c 7-weeks-old ♂

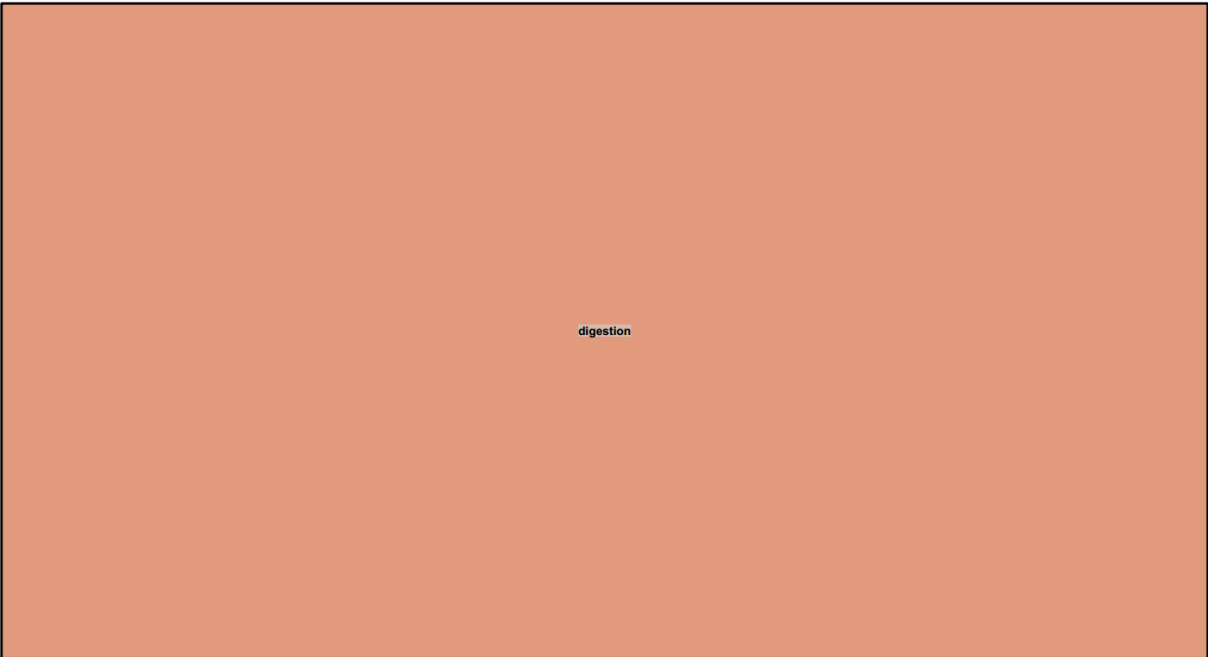

**Figure S1. Detailed information on functional associations from enrichment analysis.** Gene Ontology (GO) term enrichment analysis (<http://geneontology.org/>) was performed on differentially abundant proteins with fold change  $|FC| \geq 3$ . REVIGO (<http://revigo.irb.hr/>) was used to remove redundant GO terms and visualize respective cellular functions in the semantic similarity-based treemaps. Please note Panels A-F.

| A             |      |               |       | B              |      |                |     | C             |      |               |       |
|---------------|------|---------------|-------|----------------|------|----------------|-----|---------------|------|---------------|-------|
| C57BL/6N      |      |               |       | C57BL/6N       |      |                |     | BALB/c nude   |      |               |       |
| 7-weeks-old ♀ |      | 7-weeks-old ♂ |       | 18-weeks-old ♀ |      | 18-weeks-old ♂ |     | 7-weeks-old ♀ |      | 7-weeks-old ♂ |       |
| FC            |      | FC            |       | FC             |      | FC             |     | FC            |      | FC            |       |
| BID           | 3.2  | EGFR          | 3.9   | HMGN1          | -5.8 | SFN            | 5.0 | PSMD14        | 3.9  | BID           | 3.5   |
| CTC1          | -3.9 | MIF           | -3.8  |                |      | RPS3           | 3.0 | RAD23A        | 5.1  | CDK6          | 3.9   |
| PNP           | 3.3  | BID           | -4.9  |                |      |                |     | UBA1          | 3.2  | CGREF1        | -3.0  |
| EME2          | 6.6  | SEN2          | 3.5   |                |      |                |     | HMGN1         | -5.4 | CLASP2        | -3.4  |
|               |      | CD44          | 3.6   |                |      |                |     |               |      | EGFR          | -3.8  |
|               |      | UBE2N         | -3.2  |                |      |                |     |               |      | MAD2L1        | -3.4  |
|               |      | PNP           | -3.4  |                |      |                |     |               |      | MIF           | -4.9  |
|               |      | UBE2D3        | -3.0  |                |      |                |     |               |      | PKD2          | -3.2  |
|               |      | UBE2V2        | -3.4  |                |      |                |     |               |      | PSME3         | -3.0  |
|               |      | UBA1          | -3.0  |                |      |                |     |               |      | SEN2          | 3.6   |
|               |      | EME2          | -10.0 |                |      |                |     |               |      | UBE2L3        | -10.0 |

**Figure S2. Fold change values of differentially abundant proteins associated with DNA damage and repair pathways.** The fold change (FC) values of all proteins with  $|FC| \geq 3$  that are associated with Gene Ontology (GO) terms (<http://geneontology.org/>) for DNA damage & repair are listed. Comprehensive information on functions, interactions, and references are given in Table S8.



**Table S1. Number of proteins associated with radiation-induced responses**

| Group       |              |          | Functional category (number of proteins) |                  |                      |                        |                       |                     |                        |
|-------------|--------------|----------|------------------------------------------|------------------|----------------------|------------------------|-----------------------|---------------------|------------------------|
| Strain      | Age          | Sex      | Immune response                          | Oxidative stress | Apoptotic cell death | Other stress responses | Cell cycle regulation | DNA damage & repair | Chromatin organization |
| C57BL/6N    | 7-weeks-old  | female ♀ | 45                                       | 24               | 25                   | 5                      | 6                     | 4                   | 4                      |
| C57BL/6N    | 7-weeks-old  | male ♂   | 34                                       | 19               | 30                   | 14                     | 12                    | 11                  | 4                      |
| C57BL/6N    | 18-weeks-old | female ♀ | 8                                        | 7                | 6                    | 4                      | 2                     | 1                   | 9                      |
| C57BL/6N    | 18-weeks-old | male ♂   | 6                                        | 4                | 8                    | 0                      | 2                     | 2                   | 8                      |
| BALB/c nude | 7-weeks-old  | female ♀ | 9                                        | 12               | 12                   | 10                     | 1                     | 4                   | 9                      |
| BALB/c nude | 7-weeks-old  | male ♂   | 5                                        | 0                | 0                    | 2                      | 0                     | 0                   | 1                      |

Differentially abundant proteins with fold change (FC) values  $|FC| \geq 3$  were subjected to enrichment analysis using Gene Ontology terms (<http://geneontology.org/>). Based on GO annotations, proteins were grouped into functional categories representing hallmarks of ionizing radiation-induced responses. The number of proteins associated with respective cellular functions is shown for each group.

**Table S2. List of proteins associated with hallmark responses induced by ionizing radiation in C57BL/6N 7-weeks-old female mice**

| Accession | Protein ID | Synonym                        | Fold change | Stress response |                  |                      |       | Cell cycle regulation | DNA integrity |                        |
|-----------|------------|--------------------------------|-------------|-----------------|------------------|----------------------|-------|-----------------------|---------------|------------------------|
|           |            |                                |             | Immune response | Oxidative stress | Apoptotic cell death | Other | Cell cycle regulation | DNA damage    | Chromatin organization |
| Q6GQT1    | A2M        | A2MP                           | -4.2        | immune response |                  |                      |       |                       |               |                        |
| P61922    | ABAT       | GABAT                          | 3.4         |                 | oxidative stress |                      |       |                       |               |                        |
| P11859    | AGT        | SERPINA8                       | -3.0        |                 |                  | apoptotic cell death |       |                       |               |                        |
| P29699    | AHSG       | FETUA                          | -3.1        | immune response |                  |                      |       |                       |               |                        |
| P24549    | ALDH1A1    | AHD-2, AHD2, ALDH1             | 4.5         |                 |                  | apoptotic cell death |       |                       |               |                        |
| P47738    | ALDH2      | AHD-1, AHD1                    | 6.6         |                 | oxidative stress | apoptotic cell death |       |                       |               |                        |
| P12246    | APCS       | PTX2 SAP                       | -5.1        | immune response |                  |                      |       |                       |               |                        |
| P09813    | APOA2      |                                | -4.2        | immune response | oxidative stress |                      |       |                       |               |                        |
| P51910    | APOD       |                                | -3.5        | immune response | oxidative stress |                      |       |                       |               |                        |
| Q01339    | APOH       | B2GP1                          | -5.1        |                 |                  | apoptotic cell death |       |                       |               |                        |
| P70444    | BID        |                                | 3.2         |                 |                  | apoptotic cell death |       | cell cycle regulation | DNA damage    |                        |
| Q9ES30    | C1QTNF3    | CORS26, CTRP3                  | -3.5        | immune response |                  |                      |       |                       |               |                        |
| P06683    | C9         |                                | -3.3        | immune response |                  |                      |       |                       |               |                        |
| P16015    | CA3        | CAR3                           | 4.6         |                 | oxidative stress |                      |       |                       |               |                        |
| P24270    | CAT        | CAS-1, CAS1                    | 9.4         |                 | oxidative stress | apoptotic cell death |       |                       |               |                        |
| Q2VLH6    | CD163      | M130                           | -3.3        | immune response |                  |                      |       |                       |               |                        |
| Q08857    | CD36       |                                | 3.6         | immune response | oxidative stress | apoptotic cell death |       |                       |               |                        |
| Q9QWK4    | CD5L       | AIM, API6                      | -3.1        | immune response |                  | apoptotic cell death |       |                       |               |                        |
| Q91X79    | CELA1 ELA1 |                                | 5.4         | immune response |                  |                      |       |                       |               |                        |
| Q9CZW2    | CENPN      |                                | 5.9         |                 |                  |                      |       |                       |               | chromatin organization |
| Q61129    | CFI IF     |                                | -3.2        | immune response |                  |                      |       |                       |               |                        |
| P11680    | CFP        | PFC                            | -3.4        | immune response |                  |                      |       |                       |               |                        |
| Q8R1U2    | CGREF1     | CGR11                          | -18.8       |                 |                  |                      |       | cell cycle regulation |               |                        |
| Q61362    | CH13L1     | BRP39, CHIL1                   | -3.1        | immune response |                  | apoptotic cell death |       |                       |               |                        |
| Q91XA9    | CHIA       | CHIA1                          | -5.6        | immune response |                  | apoptotic cell death |       |                       |               |                        |
| P70194    | CLEC4F     | CLECSF13, KCLR                 | -3.9        | immune response |                  |                      |       |                       |               |                        |
| Q9JHH6    | CPB2       | TAFI                           | -3.3        |                 |                  |                      | other |                       |               |                        |
| P14847    | CRP        | PTX1                           | -3.1        | immune response | oxidative stress |                      |       |                       |               | chromatin organization |
| P07141    | CSF1       | CSFM                           | -3.2        | immune response |                  |                      |       |                       |               |                        |
| Q5SUQ9    | CTC1       |                                | -3.9        |                 |                  |                      |       | cell cycle regulation | DNA damage    |                        |
| E9Q557    | DSP        |                                | -3.1        |                 |                  |                      | other |                       |               |                        |
| Q56A04    | EME2       |                                | 6.6         |                 |                  |                      |       |                       | DNA damage    |                        |
| O88513    | GMNN       |                                | 8.3         |                 |                  |                      |       | cell cycle regulation |               |                        |
| P11352    | GPX1       |                                | 3.7         | immune response | oxidative stress | apoptotic cell death | other |                       |               |                        |
| O70325    | GPX4       |                                | 3.5         |                 | oxidative stress |                      |       |                       |               |                        |
| P43276    | HIST1H1B   | H1F5                           | -3.4        |                 |                  |                      |       |                       |               | chromatin organization |
| Q9Z0M9    | IL18BP     | IGIFBP                         | -3.4        | immune response | oxidative stress |                      |       |                       |               |                        |
| Q61730    | IL1RAP     |                                | -3.2        | immune response |                  |                      |       |                       |               |                        |
| Q64339    | ISG15      | G1P2, UCRP                     | 4.0         | immune response |                  |                      |       |                       |               |                        |
| P26262    | KLKB1      | KLK3 PK                        | -3.9        | immune response |                  |                      |       |                       |               |                        |
| P42703    | LIFR       |                                | -3.3        | immune response |                  | apoptotic cell death |       |                       |               |                        |
| Q5S006    | LRRK2      |                                | -3.6        |                 | oxidative stress | apoptotic cell death |       |                       |               |                        |
| P24527    | LTA4H      |                                | 6.1         |                 |                  |                      |       |                       |               |                        |
| Q9Z1B5    | MAD2L1     | MAD2A                          | 3.2         |                 |                  | apoptotic cell death |       | cell cycle regulation |               |                        |
| P39039    | MBL1       |                                | -4.5        | immune response |                  |                      |       |                       |               |                        |
| Q60805    | MERTK      | MER                            | -3.4        | immune response |                  | apoptotic cell death |       |                       |               |                        |
| P21956    | MFGE8      |                                | -3.1        | immune response |                  | apoptotic cell death |       |                       |               |                        |
| Q61830    | MRC1       |                                | -3.6        | immune response |                  |                      |       |                       |               |                        |
| P26928    | MST1       | HGFL                           | -3.4        |                 |                  | apoptotic cell death |       |                       |               |                        |
| Q64669    | NOO1       | DIA4, NMO1, NMOR1              | 3.0         |                 | oxidative stress | apoptotic cell death |       |                       |               |                        |
| Q6P9R2    | OXSRI      | OSR1                           | -4.2        |                 | oxidative stress |                      |       |                       |               |                        |
| Q3UR32    | P2RX3      |                                | 4.2         |                 | oxidative stress |                      | other |                       |               |                        |
| Q9CQ60    | PGLS       |                                | 3.3         |                 | oxidative stress |                      |       |                       |               |                        |
| Q8VCS0    | PGLYRP2    | PGLYRPL, PGRPL                 | -3.2        | immune response |                  |                      |       |                       |               |                        |
| Q60963    | PLA2G7     | PAFAH                          | -4.8        | immune response | oxidative stress |                      |       |                       |               |                        |
| P23492    | PNP        | NP, PNP1                       | 3.3         | immune response |                  | apoptotic cell death |       |                       | DNA damage    |                        |
| Q91XF0    | PNPO       |                                | 3.6         |                 | oxidative stress |                      |       |                       |               |                        |
| Q61171    | PRDX2      | TDPX1, TPX                     | 4.0         | immune response | oxidative stress | apoptotic cell death |       |                       |               |                        |
| P33587    | PROC       |                                | -3.0        | immune response |                  | apoptotic cell death |       |                       |               |                        |
| Q812A5    | PRR5       | PROTOR1                        | -3.8        |                 |                  |                      |       | cell cycle regulation |               |                        |
| P35230    | REG3B      | PAP PAP1                       | -5.7        | immune response |                  |                      |       |                       |               |                        |
| P47968    | RPIA       | RPI                            | 3.2         |                 | oxidative stress |                      |       |                       |               |                        |
| P05367    | SAA2       |                                | -7.1        | immune response |                  |                      |       |                       |               |                        |
| P59110    | SENP1      | SUPR2                          | -3.6        |                 |                  | apoptotic cell death |       |                       |               |                        |
| P29621    | SERPINA3C  | KLKBP                          | -5.0        | immune response |                  |                      |       |                       |               |                        |
| P07759    | SERPINA3K  | MCM2, SPI2                     | -4.8        | immune response |                  |                      |       |                       |               |                        |
| Q03734    | SERPINA3M  |                                | -4.8        | immune response |                  |                      |       |                       |               |                        |
| Q91WP6    | SERPINA3N  | SPI2                           | -4.3        | immune response |                  |                      |       |                       |               |                        |
| P32261    | SERPINC1   | AT3                            | -6.2        |                 |                  |                      |       |                       |               |                        |
| Q61247    | SERPINF2   | PLI                            | -3.3        | immune response |                  |                      |       |                       |               |                        |
| P97290    | SERPING1   | C1NH                           | -5.0        | immune response |                  |                      |       |                       |               |                        |
| P50404    | SFTPD      | SFTP4                          | -15.7       | immune response |                  |                      |       |                       |               |                        |
| P97797    | SIRPA      | BIT, MYD1, PTPNS1, SHPS1, SIRP | -3.3        | immune response |                  |                      |       |                       |               |                        |
| P48962    | SLC25A4    | ANC1, ANT1                     | -6.0        |                 |                  | apoptotic cell death |       |                       |               |                        |
| O55042    | SNCA SYN   |                                | 5.2         | immune response | oxidative stress | apoptotic cell death |       |                       |               | chromatin organization |
| P08228    | SOD1       |                                | 3.7         |                 | oxidative stress | apoptotic cell death | other |                       |               |                        |
| Q62351    | TFRC       | TRFR                           | -4.7        | immune response | oxidative stress |                      |       |                       |               |                        |
| Q9JLT4    | TXNRD2     | TRXR2                          | 3.5         |                 | oxidative stress |                      |       |                       |               |                        |

Differentially abundant proteins with fold change (FC) values  $|FC| \geq 3$  were subjected to enrichment analysis using Gene Ontology (GO) terms (<http://geneontology.org/>). Based on GO annotations, proteins were grouped into functional categories representing hallmarks of ionizing radiation-induced responses.

**Table S3. List of proteins associated with hallmark responses induced by ionizing radiation in C57BL/6N 7-weeks-old male mice**

| Accession | Protein ID | Synonym                        | Fold change | Stress response |                  |                      |       | Cell cycle regulation |            | DNA integrity          |  |
|-----------|------------|--------------------------------|-------------|-----------------|------------------|----------------------|-------|-----------------------|------------|------------------------|--|
|           |            |                                |             | Immune response | Oxidative stress | Apoptotic cell death | Other | Cell cycle regulation | DNA damage | Chromatin organization |  |
| P24549    | ALDH1A1    | AHD-2, AHD2, ALDH1             | -3.7        |                 |                  | apoptotic cell death |       |                       |            |                        |  |
| P12246    | APCS       | PTX2 SAP                       | 9.0         | immune response |                  |                      |       |                       |            |                        |  |
| Q01339    | APOH       | B2GP1                          | 3.4         |                 |                  | apoptotic cell death |       |                       |            |                        |  |
| Q9D9K3    | AVEN       |                                | -4.9        |                 |                  | apoptotic cell death |       |                       |            |                        |  |
| P70444    | BID        |                                | -4.9        |                 |                  | apoptotic cell death |       | cell cycle regulation | DNA damage |                        |  |
| Q9CY64    | BLVRA      |                                | -3.6        |                 | oxidative stress |                      |       |                       |            |                        |  |
| Q02105    | C1QC       | C1QG                           | 3.1         | immune response |                  |                      |       |                       |            |                        |  |
| P24270    | CAT        | CAS-1, CAS1                    | -5.1        |                 | oxidative stress | apoptotic cell death |       |                       |            |                        |  |
| P48758    | CBR1       | CBR                            | -3.1        |                 | oxidative stress |                      |       |                       |            |                        |  |
| Q2VLH6    | CD163      | M130                           | 3.9         | immune response |                  |                      |       |                       |            |                        |  |
| P15379    | CD44       | LY-24                          | 3.6         | immune response |                  | apoptotic cell death | other |                       | DNA damage |                        |  |
| Q64261    | CDK6       | CDKN6, CRK2                    | -4.4        | immune response |                  |                      |       | cell cycle regulation |            |                        |  |
| P31809    | CEACAM1    | BGP, BGP1, BGPD                | 3.5         | immune response |                  |                      |       |                       |            |                        |  |
| Q9CZW2    | CENPN      |                                | -7.8        |                 |                  |                      |       |                       |            | chromatin organization |  |
| Q61129    | CFI IF     |                                | 3.1         | immune response |                  |                      |       |                       |            |                        |  |
| P11680    | CFP        | PFC                            | 3.9         | immune response |                  |                      |       |                       |            |                        |  |
| Q8R1U2    | CGREF1     | CGR11                          | 3.5         |                 |                  |                      |       | cell cycle regulation |            |                        |  |
| Q91XA9    | CHIA       | CHIA1                          | 3.1         | immune response |                  | apoptotic cell death |       |                       |            |                        |  |
| Q8BRT1    | CLASP2     | KIAA0627                       | 3.6         |                 |                  |                      | other | cell cycle regulation |            |                        |  |
| P09581    | CSF1R      | CSFMR, FMS                     | 3.1         | immune response |                  | apoptotic cell death |       |                       |            |                        |  |
| P10605    | CTSB       |                                | 3.9         | immune response |                  | apoptotic cell death | other |                       |            |                        |  |
| Q9WV69    | DMTN       | EPB4.9, EPB49                  | -3.4        |                 |                  |                      | other |                       |            |                        |  |
| Q01279    | EGFR       |                                | 3.9         |                 | oxidative stress | apoptotic cell death |       | cell cycle regulation | DNA damage |                        |  |
| Q56A04    | EME2       |                                | -10.0       |                 |                  |                      |       |                       | DNA damage |                        |  |
| P97494    | GCLC       | GLCLC                          | -3.3        |                 | oxidative stress | apoptotic cell death | other |                       |            |                        |  |
| O09172    | GCLM       | GLCLR                          | -3.3        |                 | oxidative stress | apoptotic cell death |       |                       |            |                        |  |
| Q9CPU0    | GLO1       |                                | -4.1        |                 |                  | apoptotic cell death |       |                       |            |                        |  |
| O88513    | GMNN       |                                | -7.5        |                 |                  |                      |       | cell cycle regulation |            |                        |  |
| P11352    | GPX1       |                                | -3.3        | immune response | oxidative stress | apoptotic cell death | other |                       |            |                        |  |
| P14220    | GYP A      |                                | -4.0        |                 |                  |                      | other |                       |            |                        |  |
| P22907    | HMBS       | UROS1                          | -3.9        | immune response | oxidative stress |                      |       |                       |            |                        |  |
| Q91X72    | HPX HPXN   |                                | 5.0         | immune response |                  |                      |       |                       |            |                        |  |
| P48722    | HSPA4L     | APG1, HSP4L, OSP94             | -3.1        |                 |                  |                      | other |                       |            |                        |  |
| Q9JHJ8    | ICOSLG     | B7H2, B7RP1, ICOSL             | 3.4         | immune response |                  |                      |       |                       |            |                        |  |
| Q35664    | IFNAR2     |                                | 3.6         | immune response |                  |                      |       |                       |            |                        |  |
| Q9Z0M9    | IL18BP     | IGIFBP                         | 3.2         | immune response | oxidative stress |                      |       |                       |            |                        |  |
| P27931    | IL1R2      | IL-1R2, IL1RB                  | 3.4         | immune response |                  |                      |       |                       |            |                        |  |
| Q64339    | ISG15      | G1P2, UCRP                     | -4.5        | immune response |                  |                      |       |                       |            |                        |  |
| P05532    | KIT SL     |                                | 4.8         | immune response |                  | apoptotic cell death |       |                       |            |                        |  |
| P15947    | KLK1       | KLK-6, KLK6                    | 3.5         |                 |                  |                      | other |                       |            |                        |  |
| P11438    | LAMP1      | LAMP-1                         | 3.3         | immune response |                  | apoptotic cell death |       |                       |            |                        |  |
| P17897    | LYZ1       | LZP-S                          | 3.3         |                 |                  |                      | other |                       |            |                        |  |
| Q9Z1B5    | MAD2L1     | MAD2A                          | -3.5        |                 |                  | apoptotic cell death |       | cell cycle regulation |            |                        |  |
| P34884    | MIF        |                                | -3.8        |                 |                  | apoptotic cell death |       | cell cycle regulation | DNA damage |                        |  |
| Q61830    | MRC1       |                                | 3.0         | immune response |                  |                      |       |                       |            |                        |  |
| Q64669    | NQO1       | DIA4, NMO1, NMOR1              | -3.6        |                 | oxidative stress | apoptotic cell death |       |                       |            |                        |  |
| Q60590    | ORM1       | AGP1, ORM-1                    | 6.6         | immune response |                  |                      |       |                       |            |                        |  |
| P07361    | ORM2       | AGP-2, ORM-2                   | 18.0        | immune response |                  |                      |       |                       |            |                        |  |
| Q6P9R2    | OXSRI      | OSR1                           | 5.0         |                 | oxidative stress |                      |       |                       |            |                        |  |
| Q9JK95    | PERP       | KRTCAP1                        | 7.5         |                 |                  | apoptotic cell death |       |                       |            |                        |  |
| Q9CQ60    | PGLS       |                                | -3.0        |                 | oxidative stress |                      |       |                       |            |                        |  |
| Q9ET66    | PI16       | CRIP1                          | 5.3         |                 |                  |                      |       |                       |            |                        |  |
| O35245    | PKD2       | TRPP2                          | 8.4         |                 | oxidative stress |                      | other | cell cycle regulation |            |                        |  |
| P23492    | PNP        | NP, PNP1                       | -3.4        | immune response |                  | apoptotic cell death |       |                       | DNA damage |                        |  |
| Q91XF0    | PNPO       |                                | -3.8        |                 | oxidative stress |                      |       |                       |            |                        |  |
| P58389    | PPP2R4     | PTPA                           | -4.1        |                 |                  | apoptotic cell death |       |                       |            |                        |  |
| O88531    | PPT1       | PPT                            | 4.4         |                 |                  | apoptotic cell death |       |                       |            |                        |  |
| Q61171    | PRDX2      | TDPX1, TPX                     | -5.2        | immune response | oxidative stress | apoptotic cell death |       |                       |            |                        |  |
| Q64695    | PROCR      | EPCR                           | 3.4         | immune response |                  |                      |       |                       |            |                        |  |
| P97372    | PSME2      | PA28B1                         | -3.1        | immune response |                  |                      |       |                       |            |                        |  |
| P61290    | PSME3      |                                | -3.3        |                 |                  | apoptotic cell death |       | cell cycle regulation |            |                        |  |
| Q3UZA1    | RCS D1     | CAPZIP                         | 3.3         |                 |                  |                      | other |                       |            |                        |  |
| P05366    | SAA1       |                                | 19.2        | immune response |                  |                      |       |                       |            |                        |  |
| P05367    | SAA2       |                                | 10.6        | immune response |                  |                      |       |                       |            |                        |  |
| P59110    | SEN P1     | SUPR2                          | 3.7         |                 |                  | apoptotic cell death |       |                       |            |                        |  |
| Q91ZX6    | SEN P2     | SMT3IP2, SUPR1                 | 3.5         |                 |                  |                      |       | cell cycle regulation | DNA damage |                        |  |
| Q91WP6    | SERPINA3N  | SPI2                           | 3.7         | immune response |                  |                      |       |                       |            |                        |  |
| P97797    | SIRPA      | BIT, MYD1, PTPNS1, SHPS1, SIRP | 4.4         | immune response |                  |                      |       |                       |            |                        |  |
| O55042    | SNCA SYN   |                                | -5.1        | immune response | oxidative stress | apoptotic cell death |       |                       |            | chromatin organization |  |
| P08228    | SOD1       |                                | -3.0        |                 | oxidative stress | apoptotic cell death | other |                       |            |                        |  |
| Q64105    | SPR        |                                | -3.4        |                 | oxidative stress |                      |       |                       |            |                        |  |
| Q9JLT4    | TXNRD2     | TRXR2                          | -3.5        |                 | oxidative stress |                      |       |                       |            |                        |  |
| Q02053    | UBA1       | SBX, UBE1, UBE1AX, UBE1X       | -3.0        |                 |                  |                      |       |                       | DNA damage |                        |  |
| P61079    | UBE2D3     |                                | -3.0        |                 |                  | apoptotic cell death |       |                       | DNA damage |                        |  |
| P68037    | UBE2L3     | UBCE7                          | -3.3        |                 |                  |                      |       | cell cycle regulation |            |                        |  |
| P61089    | UBE2N      | BLU                            | -3.2        | immune response |                  |                      |       |                       | DNA damage | chromatin organization |  |
| Q9D2M8    | UBE2V2     | MMS2, UEV2                     | -3.4        |                 |                  | apoptotic cell death |       |                       | DNA damage |                        |  |
| Q8R5H1    | USP15      | KIAA0529                       | -3.2        |                 |                  |                      |       |                       |            | chromatin organization |  |
| Q8CB27    | YOD1       |                                | -3.2        |                 |                  |                      | other |                       |            |                        |  |

Differentially abundant proteins with fold change (FC) values  $|FC| \geq 3$  were subjected to enrichment analysis using Gene Ontology (GO) terms (<http://geneontology.org/>). Based on GO annotations, proteins were grouped into functional categories representing hallmarks of ionizing radiation-induced responses.

Table S4. List of proteins associated with hallmark responses induced by ionizing radiation in C57BL/6N 18-weeks-old female mice

| Accession | Protein ID | Synonym                         | Fold change | Stress response |                  |                      |       | Cell cycle regulation | DNA integrity |                        |
|-----------|------------|---------------------------------|-------------|-----------------|------------------|----------------------|-------|-----------------------|---------------|------------------------|
|           |            |                                 |             | Immune response | Oxidative stress | Apoptotic cell death | Other | Cell cycle regulation | DNA damage    | Chromatin organization |
| P24549    | ALDH1A1    | AHD-2, AHD2, ALDH1              | 3.6         |                 |                  | apoptotic cell death |       |                       |               |                        |
| P24270    | CAT        | CAS-1, CAS1                     | 3.7         |                 | oxidative stress | apoptotic cell death |       |                       |               |                        |
| Q9CZW2    | CENPN      |                                 | 3.4         |                 |                  |                      |       |                       |               | chromatin organization |
| Q8C196    | CPS1       |                                 | 3.2         |                 | oxidative stress |                      | other |                       |               |                        |
| P15105    | GLUL       | GLNS                            | 3.6         |                 |                  |                      |       | cell cycle regulation |               |                        |
| O88513    | GMNN       |                                 | 3.1         |                 |                  |                      |       | cell cycle regulation |               |                        |
| P06745    | GPI        | GPI1                            | 3.6         |                 |                  | apoptotic cell death |       |                       |               |                        |
| P14220    | GYP A      |                                 | 3.4         |                 |                  |                      | other |                       |               |                        |
| P10922    | H1F0       | H1FV                            | -3.4        |                 |                  |                      |       |                       |               | chromatin organization |
| P01902    | H2-K1      | H2-K                            | -23.3       | immune response |                  |                      |       |                       |               |                        |
| P43276    | HIST1H1B   | H1F5                            | -4.9        |                 |                  |                      |       |                       |               | chromatin organization |
| P10854    | HIST1H2BM  |                                 | -3.8        |                 |                  |                      |       |                       |               | chromatin organization |
| P68433    | HIST1H3A   | H3A, HIST1H3G, H3.1-221, etc.   | -3.8        |                 |                  |                      |       |                       |               | chromatin organization |
| P62806    | HIST1H4A   | HIST1H4B, H4-53, HIST1H4C, etc. | -4.8        |                 |                  |                      |       |                       |               | chromatin organization |
| P17095    | HMG A1     | HMG I, HMG IY                   | -3.2        |                 |                  |                      |       |                       |               | chromatin organization |
| P18608    | HMG N1     | HMG-14, HMG14                   | -5.8        |                 |                  |                      |       |                       | DNA damage    | chromatin organization |
| P07901    | HSP90AA1   | HSP86, HSP86-1, HSPCA           | 4.2         | immune response | oxidative stress | apoptotic cell death | other |                       |               |                        |
| P08113    | HSP90B1    | GRP94, TRA-1, TRA1              | 4.4         |                 | oxidative stress | apoptotic cell death |       |                       |               |                        |
| O35343    | KPNA4      | QIP1                            | 3.0         |                 | oxidative stress |                      |       |                       |               |                        |
| P17897    | LYZ1       | LZP-S                           | -15.5       |                 |                  |                      | other |                       |               |                        |
| Q99KQ4    | NAMPT      | PBEF1                           | 4.6         |                 | oxidative stress |                      |       |                       |               |                        |
| Q78ZA7    | NAP1L4     |                                 | 3.3         |                 |                  |                      |       |                       |               | chromatin organization |
| P07361    | ORM2       | AGP-2, ORM-2                    | 21.5        | immune response |                  |                      |       |                       |               |                        |
| Q6P9R2    | OXS R1     | OSR1                            | -3.4        |                 | oxidative stress |                      |       |                       |               |                        |
| Q9DAK9    | PHPT1      | PHP14                           | 5.5         | immune response |                  |                      |       |                       |               |                        |
| P58389    | PPP2R4     | PTPA                            | 4.0         |                 |                  | apoptotic cell death |       |                       |               |                        |
| P35230    | REG3B      | PAP PAP1                        | -8.7        | immune response |                  |                      |       |                       |               |                        |
| P05366    | SAA1       |                                 | 37.3        | immune response |                  |                      |       |                       |               |                        |
| P05367    | SAA2       |                                 | 92.7        | immune response |                  |                      |       |                       |               |                        |
| P97430    | SLPI       |                                 | -6.5        | immune response |                  |                      |       |                       |               |                        |

Differentially abundant proteins with fold change (FC) values |FC| ≥ 3 were subjected to enrichment analysis using Gene Ontology (GO) terms (<http://geneontology.org/>). Based on GO annotations, proteins were grouped into functional categories representing hallmarks of ionizing radiation-induced responses.

Table S5. List of proteins associated with hallmark responses induced by ionizing radiation in C57BL/6N 18-weeks-old male mice

| Accession | Protein ID | Synonym                         | Fold change | Stress response |                  |                      |       | Cell cycle regulation | DNA integrity |                        |
|-----------|------------|---------------------------------|-------------|-----------------|------------------|----------------------|-------|-----------------------|---------------|------------------------|
|           |            |                                 |             | Immune response | Oxidative stress | Apoptotic cell death | Other | Cell cycle regulation | DNA damage    | Chromatin organization |
| Q61335    | BCAP31     | BAP31                           | 3.5         |                 |                  | apoptotic cell death |       |                       |               |                        |
| Q9CQC6    | BZW1       |                                 | 4.5         |                 |                  |                      |       |                       |               | chromatin organization |
| Q91X79    | CELA1      | ELA1                            | -3.2        | immune response |                  |                      |       |                       |               |                        |
| P30275    | CKMT1      |                                 | 3.9         |                 |                  | apoptotic cell death |       | cell cycle regulation |               |                        |
| P43276    | HIST1H1B   | H1F5                            | 3.9         |                 |                  |                      |       |                       |               | chromatin organization |
| Q8CGP6    | HIST1H2AH  |                                 | 5.3         |                 |                  |                      |       |                       |               | chromatin organization |
| P10854    | HIST1H2BM  |                                 | 5.5         |                 |                  |                      |       |                       |               | chromatin organization |
| P68433    | HIST1H3A   | H3A, HIST1H3G, H3.1-221, etc.   | 5.4         |                 |                  |                      |       |                       |               | chromatin organization |
| P62806    | HIST1H4A   | HIST1H4B, H4-53, HIST1H4C, etc. | 5.7         |                 |                  |                      |       |                       |               | chromatin organization |
| Q8CGP0    | HIST3H2BB  | HIST3H2BB-PS                    | 6.7         |                 |                  |                      |       |                       |               | chromatin organization |
| P11672    | LCN2       |                                 | -4.3        | immune response | oxidative stress | apoptotic cell death |       |                       |               |                        |
| P48678    | LMNA       | LMN1                            | 3.1         |                 | oxidative stress | apoptotic cell death |       |                       |               |                        |
| Q920Y2    | PLA2G1B    | PLA2                            | -4.7        | immune response |                  |                      |       |                       |               |                        |
| P62830    | RPL23      |                                 | 3.3         |                 |                  |                      |       |                       |               |                        |
| P27659    | RPL3       |                                 | 3.0         | immune response |                  |                      |       |                       |               |                        |
| P62908    | RPS3       |                                 | 3.0         |                 | oxidative stress | apoptotic cell death |       |                       | DNA damage    |                        |
| P05367    | SAA2       |                                 | -4.7        | immune response |                  |                      |       |                       |               |                        |
| O70456    | SFN        | MKRN3                           | 5.0         |                 |                  | apoptotic cell death |       | cell cycle regulation | DNA damage    |                        |
| P51881    | SLC25A5    | ANT2                            | 5.7         |                 |                  | apoptotic cell death |       |                       |               |                        |
| O55042    | SNCA       | SYN                             | -3.1        | immune response | oxidative stress | apoptotic cell death |       |                       |               | chromatin organization |

Differentially abundant proteins with fold change (FC) values |FC| ≥ 3 were subjected to enrichment analysis using Gene Ontology (GO) terms (<http://geneontology.org/>). Based on GO annotations, proteins were grouped into functional categories representing hallmarks of ionizing radiation-induced responses.

Table S6. List of proteins associated with hallmark responses induced by ionizing radiation in BALB/c nude 7-weeks-old female mice

| Accession | Protein ID | Synonym                   | Fold change | Stress response |                  |                      |       | Cell cycle regulation | DNA integrity     |                        |
|-----------|------------|---------------------------|-------------|-----------------|------------------|----------------------|-------|-----------------------|-------------------|------------------------|
|           |            |                           |             | Immune response | Oxidative stress | Apoptotic cell death | Other | Cell cycle regulation | DNA damage        | Chromatin organization |
| Q8BGQ7    | AARS       |                           | 3.2         |                 |                  | apoptotic cell death | other |                       |                   |                        |
| Q62151    | AGER       | RAGE                      | -7.1        | immune response | oxidative stress | apoptotic cell death | other |                       |                   |                        |
| P24270    | CAT        | CAS-1, CAS1               | 5.7         |                 | oxidative stress | apoptotic cell death |       |                       |                   |                        |
| Q08857    | CD36       |                           | 4.9         | immune response | oxidative stress | apoptotic cell death |       |                       |                   |                        |
| Q61735    | CD47       |                           | 4.6         | immune response |                  |                      |       |                       |                   |                        |
| Q9CZW2    | CENPN      |                           | 6.1         |                 |                  |                      |       |                       |                   | chromatin organization |
| Q8C196    | CPS1       |                           | 4.8         |                 | oxidative stress |                      | other |                       |                   |                        |
| O89114    | DNAJB5     | HSC40                     | -5.0        |                 |                  |                      | other |                       |                   |                        |
| E9Q557    | DSP        |                           | -3.4        |                 |                  |                      | other |                       |                   |                        |
| P54731    | FAF1       |                           | 3.9         |                 |                  | apoptotic cell death |       |                       |                   |                        |
| P35550    | FBL        |                           | -4.2        |                 |                  |                      |       |                       |                   | chromatin organization |
| P97494    | GCLC       | GLCLC                     | 4.8         |                 | oxidative stress | apoptotic cell death | other |                       |                   |                        |
| O09172    | GCLM       | GLCLR                     | 5.6         |                 | oxidative stress | apoptotic cell death |       |                       |                   |                        |
| P14220    | GYPA       |                           | 5.7         |                 |                  |                      | other |                       |                   |                        |
| P10922    | H1F0       | H1FV                      | -4.9        |                 |                  |                      |       |                       |                   | chromatin organization |
| P15864    | HIST1H1C   | H1F2                      | -4.0        |                 |                  |                      |       |                       |                   | chromatin organization |
| P22907    | HMBS       | UROS1                     | 4.5         | immune response | oxidative stress |                      |       |                       |                   | chromatin organization |
| P17095    | HMGA1      | HMG1, HMG1Y               | -4.0        |                 |                  |                      |       |                       |                   | chromatin organization |
| P18608    | HMG1       | HMG-14, HMG14             | -5.4        |                 |                  |                      |       |                       | DNA damage        | chromatin organization |
| P09602    | HMG2       | HMG-17, HMG17             | -3.4        |                 |                  |                      |       |                       |                   | chromatin organization |
| P07901    | HSP90AA1   | HSP86, HSP86-1, HSPCA     | 5.1         | immune response | oxidative stress | apoptotic cell death | other |                       |                   |                        |
| P08113    | HSP90B1    | GRP94, TRA-1, TRA1        | 3.9         |                 | oxidative stress | apoptotic cell death |       |                       |                   |                        |
| P48722    | HSPA4L     | APG1, HSP4L, OSP94        | 3.0         |                 |                  |                      | other |                       |                   |                        |
| Q64339    | ISG15      | G1P2, UCRP                | 3.4         | immune response |                  |                      |       |                       |                   |                        |
| P17897    | LYZ1       | LZP-S                     | -3.8        |                 |                  |                      | other |                       |                   |                        |
| P28656    | NAP1L1     | NRP                       | 4.4         |                 |                  |                      |       |                       |                   | chromatin organization |
| Q78ZA7    | NAP1L4     |                           | 5.3         |                 |                  |                      |       |                       |                   | chromatin organization |
| P58389    | PPP2R4     | PTPA                      | 4.9         |                 |                  | apoptotic cell death |       |                       |                   |                        |
| Q61171    | PRDX2      | TDPX1, TPX                | 4.2         | immune response | oxidative stress | apoptotic cell death |       |                       |                   |                        |
| O35593    | PSMD14     | PAD1                      | 3.9         |                 |                  |                      |       |                       | Damage and repair |                        |
| P54726    | RAD23A     | MHR23A                    | 5.1         |                 |                  |                      |       |                       | DNA damage        |                        |
| P47968    | RPIA       | RPI                       | 3.2         |                 | oxidative stress |                      |       |                       |                   |                        |
| P14869    | RPLP0      | ARBP                      | 3.3         | immune response |                  |                      |       |                       |                   |                        |
| Q80UG5    | SEPT9      | KIAA0991, SINT1           | -5.5        |                 |                  |                      |       | cell cycle regulation |                   |                        |
| Q9QZ19    | SERINC3    | AIGP1, DIFF33, TDE1, TMS1 | 4.0         | immune response |                  | apoptotic cell death |       |                       |                   |                        |
| Q9JIM1    | SLC29A1    | ENT1                      | 7.5         |                 | oxidative stress |                      |       |                       |                   |                        |
| Q02053    | UBA1       | SBX, UBE1, UBE1AX, UBE1X  | 3.2         |                 |                  |                      |       |                       | DNA damage        |                        |

Differentially abundant proteins with fold change (FC) values |FC| ≥ 3 were subjected to enrichment analysis using Gene Ontology (GO) terms (<http://geneontology.org/>). Based on GO annotations, proteins were grouped into functional categories representing hallmarks of ionizing radiation-induced responses.

Table S7. List of proteins associated with hallmark responses induced by ionizing radiation in BALB/c nude 7-weeks-old male mice

| Accession | Protein ID | Synonym | Fold change | Stress response |                  |                      |       | Cell cycle regulation | DNA integrity |                        |
|-----------|------------|---------|-------------|-----------------|------------------|----------------------|-------|-----------------------|---------------|------------------------|
|           |            |         |             | Immune response | Oxidative stress | Apoptotic cell death | Other | Cell cycle regulation | DNA damage    | Chromatin organization |
| Q91X79    | CELA1 ELA1 |         | 3.0         | immune response |                  |                      |       |                       |               |                        |
| Q08093    | CNN2       |         | 3.4         | immune response |                  |                      | other |                       |               |                        |
| P08121    | COL3A1     |         | -3.3        | immune response |                  |                      | other |                       |               |                        |
| O35601    | FYB        |         | 5.6         | immune response |                  |                      |       |                       |               |                        |
| P39039    | MBL1       |         | -3.2        | immune response |                  |                      |       |                       |               |                        |
| P28656    | NAP1L1     | NRP     | 3.3         |                 |                  |                      |       |                       |               | chromatin organization |

Differentially abundant proteins with fold change (FC) values  $|FC| \geq 3$  were subjected to enrichment analysis using Gene Ontology (GO) terms (<http://geneontology.org/>). Based on GO annotations, proteins were grouped into functional categories representing hallmarks of ionizing radiation-induced responses.

Table S8. Detailed information on differentially abundant proteins associated with DNA damage and repair pathways

| Protein | Protein name                                        | Compartment                         | Category                                                         | Functions                                                                                                                                                                                                                                                                                       | Key interaction with                                    |                                                                                         | References                                                                                                                                             |
|---------|-----------------------------------------------------|-------------------------------------|------------------------------------------------------------------|-------------------------------------------------------------------------------------------------------------------------------------------------------------------------------------------------------------------------------------------------------------------------------------------------|---------------------------------------------------------|-----------------------------------------------------------------------------------------|--------------------------------------------------------------------------------------------------------------------------------------------------------|
|         |                                                     |                                     |                                                                  |                                                                                                                                                                                                                                                                                                 | direct                                                  | indirect (downstream effect on)                                                         |                                                                                                                                                        |
| BID     | BH3-interacting domain death agonist                | nucleus, mitochondria               | DNA damage & repair, cell cycle                                  | balancing mitochondrial ROS, critical pro-survival role in cell cycle arrest                                                                                                                                                                                                                    | ATM                                                     | pro-survival                                                                            | Gross et al. Cell Death Differ. 2016;23(1):182                                                                                                         |
| CD44    | CD44 antigen                                        | nucleus                             | DNA damage & repair                                              | ATM effector in the DNA damage response                                                                                                                                                                                                                                                         | ATM                                                     |                                                                                         | Kamer et al. Cell. 2005;122(4):593-603                                                                                                                 |
| CDK6    | cyclin-dependent kinase 6                           | plasma membrane                     | immune system (among others)                                     | role in activation, recirculation and homing of T-lymphocytes, hematopoiesis, inflammation, cell migration, and cell-cell adhesion                                                                                                                                                              | various proteins                                        | various                                                                                 | Wu et al. Immunity. 2014;41(2):270-82; Naujokas et al. Cell. 1993;74(2):257-68.                                                                        |
| CGREF1  | cell growth regulator with EF hand domain protein 1 | nucleus, cytosol                    | cell cycle                                                       | plays a role in the accumulation of p53 and p130 keeping cells from entering cell division if there is DNA damage, activating pro-apoptotic pathways                                                                                                                                            |                                                         | p53, p130                                                                               | Nagasawa et al. Oncogene. 2001;20(23):2889-99.                                                                                                         |
| CLASP2  | CLIP-associated protein 2                           | extracellular region                | cell cycle                                                       | can inhibit growth                                                                                                                                                                                                                                                                              |                                                         |                                                                                         | by similarity                                                                                                                                          |
| CTC1    | CST complex subunit CTC1                            | cytosol                             | cell cycle                                                       | mediates cell-cell adhesion in a calcium-dependent manner                                                                                                                                                                                                                                       | calcium signaling                                       |                                                                                         | by similarity                                                                                                                                          |
|         |                                                     |                                     |                                                                  | stabilizing function of the kinetochore which is essential for the bipolar alignment of chromosomes on the mitotic spindle; similar function for microtubules                                                                                                                                   | kinetochore, microtubules                               |                                                                                         | Pereira AL et al. Mol Biol Cell. 2006;17(10):4526-42.                                                                                                  |
|         |                                                     |                                     |                                                                  | component of the CST complex proposed to act as a specialized replication factor promoting DNA replication under conditions of replication stress or natural replication barriers such as the telomere duplex.                                                                                  | DNA                                                     | DNA replication/damage recovery                                                         | Miyake et al. Mol Cell. 2009;36(2):193-206.                                                                                                            |
| EGFR    | epidermal growth factor receptor                    | nucleus, ER, plasma membrane        | cell cycle                                                       | DNA replication/damage recovery. CST complex facilitates recovery from many forms of exogenous DNA damage; involved in several aspects of telomere replication                                                                                                                                  |                                                         |                                                                                         | Wu et al. Cell. 2012;150(1):39-52.                                                                                                                     |
| EME2    | probable crossover junction endonuclease            | nucleus                             | DNA damage & repair, DNA recombination                           | endonuclease activity; interacts with MUS81 to form a DNA structure-specific endonuclease which cleaves substrates such as 3'-flap structures                                                                                                                                                   | adaptor proteins (various)                              | RAS-RAF-MEK-ERK, PI3 kinase-AKT, PLCgamma-PKC and STATs modules; speculated: NF-kappa-B | Fazlali et al. EMBO J. 1993;12(10):3799-808; Confalonieri et al. J Cell Biol. 2000;150(4):905-12; Penco et al. Nucleic Acids Res. 2010;38(21):7446-57. |
| HMG1    | non-histone chromosomal protein HMG-14              | nucleus                             | DNA damage & repair, transcription                               | DNA double-strand break repair, intra-S DNA damage checkpoint, replication fork processing                                                                                                                                                                                                      | MUS81, DNA                                              |                                                                                         | GO annotations                                                                                                                                         |
| MAD2L1  | MAD2 mitotic arrest deficient-like 1                | nucleus, cytoskeleton               | cell cycle                                                       | binds to nucleosomal DNA altering DNA-histone interaction; may be involved in maintaining transcribable genes in a unique chromatin conformation                                                                                                                                                | DNA                                                     |                                                                                         | Lin et al. Mol Cell. 2004;15(4):573-84.                                                                                                                |
| MIF     | macrophage migration inhibitory factor              | extracellular region                | immune system                                                    | role in transcription-coupled nucleotide-excision repair, chromatin organization, transcription, and UV-B/C responses                                                                                                                                                                           | DNA                                                     |                                                                                         | GO annotations                                                                                                                                         |
| PKD2    | polycystin-2                                        | plasma membrane, ER                 | calcium signaling                                                | component of the spindle-assembly checkpoint and required for the execution of the mitotic checkpoint                                                                                                                                                                                           | DNA                                                     | checkpoint control                                                                      | by similarity                                                                                                                                          |
| PNP     | purine nucleoside phosphorylase                     | nucleus, mitochondria, cytoskeleton | DNA damage & repair, immune system, apoptosis, purine metabolism | pro-inflammatory cytokine involved in the innate immune response and counteracts the anti-inflammatory activity of glucocorticoids                                                                                                                                                              |                                                         | NF-kB                                                                                   | Kim et al. Cell Signal. 2011;110-120.                                                                                                                  |
| PSMD14  | 26S proteasome non-ATPase regulatory subunit 14     | cytosol                             | DNA damage & repair, cell cycle, apoptosis, proteasome           | component of a homotetrameric or heteromeric (with PKD1) calcium-permeable ion channel activated through Wnt signaling                                                                                                                                                                          | calcium signaling                                       |                                                                                         | Kim et al. Nat Cell Biol. 2016;18(7):752-764.                                                                                                          |
| PSME3   | proteasome acti29-C29                               | nucleus                             | DNA damage & repair, cell cycle, apoptosis                       | involved in purine nucleoside salvage; also functional association with DNA damage & repair, immune system, and negative regulation of T cell apoptotic process                                                                                                                                 | ribonucleolides                                         | anti-apoptotic                                                                          | Uniprot; GO annotations, Jernth and Snyder. Nucleic Acids Res. 1991;19(7):1708.                                                                        |
|         |                                                     |                                     |                                                                  | subunit of the 15S REG gamma proteasome regulator with anti-apoptotic function and potential role in cell cycle regulation; facilitates the MDM2-p53/TP53 interaction and thus degradation of p53/TP53, which limits its accumulation resulting in inhibition of apoptosis following DNA damage | proteasome                                              |                                                                                         | by similarity                                                                                                                                          |
| RAD23A  | UV excision repair protein RAD23 homolog A          | nucleus                             | DNA damage & repair                                              | involved in nucleotide excision repair as XPC-RAD23A dimer (NER activity); speculated to be equivalent for Rad23b in global genome nucleotide excision repair (GG-NER)                                                                                                                          | p53/TP53                                                | anti-apoptotic                                                                          | Ng et al. Genes Dev. 2003;17(13):1630-45; Okuda et al. DNA Repair (Amst). 2004;3(10):1285-95.                                                          |
|         |                                                     |                                     |                                                                  | involved in modulation of proteasomal degradation (26S proteasome)                                                                                                                                                                                                                              | XPC                                                     |                                                                                         | by similarity                                                                                                                                          |
|         |                                                     |                                     |                                                                  | role in DNA damage repair (also high affinity for 8-oxoG lesions)                                                                                                                                                                                                                               | proteasome                                              |                                                                                         | Kim et al. J Biol Chem. 1995;270(23):13620-9; by similarity                                                                                            |
| RPS3    | 40S ribosomal protein S3                            | nucleus, mitochondria, cytoskeleton | DNA damage & repair, cell cycle                                  | involved in spindle formation and chromosome movement by regulating microtubule polymerization during mitosis                                                                                                                                                                                   | DNA, UNG1, APEX1                                        |                                                                                         | by similarity                                                                                                                                          |
|         |                                                     |                                     |                                                                  | involved in spindle formation and chromosome movement by regulating microtubule polymerization during mitosis                                                                                                                                                                                   | microtubule regulation                                  |                                                                                         | by similarity                                                                                                                                          |
|         |                                                     |                                     |                                                                  | binds to and TP53/p53 and protects from MDM2-mediated ubiquitination; pro-apoptotic function through its role in activating CASP8 (among others)                                                                                                                                                | p53/TP53                                                | pro-apoptotic                                                                           | Jang et al. FEBS Lett. 2004;560(1-3):81-5. GO annotations                                                                                              |
| SENP2   | sentrin-specific protease 2                         | nucleus                             | transcription                                                    | part of the NF-kappa-B p65-p50 complex (binds to the RELA/p65 subunit)                                                                                                                                                                                                                          | NF-kB                                                   |                                                                                         | by similarity                                                                                                                                          |
|         |                                                     |                                     |                                                                  | posttranslational modification (sumoylation)                                                                                                                                                                                                                                                    | various proteins                                        | Wnt pathway (speculated)                                                                | by similarity                                                                                                                                          |
|         |                                                     |                                     |                                                                  | DNA damage & repair                                                                                                                                                                                                                                                                             |                                                         | suppresses DNA damage response                                                          | GO annotations                                                                                                                                         |
| SNF     | 14-3-3 protein sigma                                | nucleus, extracellular region       | cell cycle                                                       | negative regulation of DNA damage response (signal transduction by p53 class mediator)                                                                                                                                                                                                          | various proteins                                        | checkpoint control                                                                      | GO annotations                                                                                                                                         |
|         |                                                     |                                     |                                                                  | regulation of G1/S transition of mitotic cell cycle                                                                                                                                                                                                                                             |                                                         | general and specialized signaling                                                       | by similarity; GO annotations                                                                                                                          |
|         |                                                     |                                     |                                                                  | adapter protein implicated in the regulation of various general and specialized signaling pathways                                                                                                                                                                                              |                                                         | pro-apoptotic                                                                           | GO annotations                                                                                                                                         |
| UBA1    | ubiquitin-like modifier-activating enzyme 1         | nucleus, mitochondria               | DNA damage & repair                                              | intrinsic apoptotic signaling pathway in response to DNA damage                                                                                                                                                                                                                                 | proteasome                                              |                                                                                         |                                                                                                                                                        |
|         |                                                     |                                     |                                                                  | plays a key role in the ubiquitin-proteasome system catalyzing the first step in ubiquitin conjugation                                                                                                                                                                                          |                                                         |                                                                                         |                                                                                                                                                        |
|         |                                                     |                                     |                                                                  | essential for the formation of radiation-induced foci and DNA repair, as well as for responses to replication stress; promotes the recruitment of TP53BP1 and BRCA1 at DNA damage sites                                                                                                         |                                                         |                                                                                         |                                                                                                                                                        |
|         |                                                     |                                     |                                                                  | part of the ubiquitination system                                                                                                                                                                                                                                                               |                                                         |                                                                                         |                                                                                                                                                        |
| UBE2D3  | ubiquitin-conjugating enzyme E2 D3                  | plasma membrane, endosome           | DNA damage & repair                                              | involved in the DNA damage tolerance (DDT) pathway by regulating mono- and poly-ubiquitination of PCNA                                                                                                                                                                                          | proteasome                                              | TP53BP1, BRCA1                                                                          | by similarity                                                                                                                                          |
|         |                                                     |                                     |                                                                  | involved in ubiquitination of DNA lesions by interacting with the BRCA1/BARD1 E3 ligase complex                                                                                                                                                                                                 |                                                         | NFKBIA proteasomal degradation                                                          | by similarity; GO annotations                                                                                                                          |
|         |                                                     |                                     |                                                                  | plays a role in ubiquitination of p53/TP53 together with the MDM2 and TOPORS E3 ligases                                                                                                                                                                                                         | BRCA1/BARD1 E3 ligase complex                           | ubiquitination of PCNA                                                                  | by similarity; GO annotations                                                                                                                          |
| UBE2L3  | ubiquitin-conjugating enzyme E2 L3                  | nucleus                             | ubiquitin-proteasome system                                      | ubiquitin-conjugating enzyme E2 that specifically acts with HECT-type and RBR family E3 ubiquitin-protein ligases (e.g. PRKN and ARIH1)                                                                                                                                                         | MDM2, TOPORS E3 ligases                                 | ubiquitination of DNA lesions                                                           | by similarity; GO annotations                                                                                                                          |
|         |                                                     |                                     |                                                                  | involved in regulating progression through the cell cycle (down-regulated during the S-phase)                                                                                                                                                                                                   | E3 ubiquitin-protein ligases (HECT-type and RBR family) | ubiquitination of p53/TP53                                                              | by similarity; GO annotations                                                                                                                          |
|         |                                                     |                                     |                                                                  | regulates transcriptional activity of nuclear hormone receptors                                                                                                                                                                                                                                 |                                                         | selective degradation of short-lived and abnormal proteins                              | by similarity; GO annotations                                                                                                                          |
|         |                                                     |                                     |                                                                  | DNA damage & repair                                                                                                                                                                                                                                                                             |                                                         | cell cycle progression                                                                  | by similarity; GO annotations                                                                                                                          |
| UBE2N   | ubiquitin-conjugating enzyme E2 N                   | nucleus                             | cell cycle                                                       | plays a role in error-free DNA repair and contributes to the survival of cells after DNA damage; acts together with the E3 ligases (HLTF and SHPRH) in the 'Lys-63-linked poly-ubiquitination of PCNA upon genotoxic stress                                                                     | HLTF, SHPRH                                             | pro-survival                                                                            | by similarity; GO annotations                                                                                                                          |
|         |                                                     |                                     |                                                                  | plays a role in regulating cell cycle progression                                                                                                                                                                                                                                               |                                                         | cell cycle progression                                                                  | by similarity                                                                                                                                          |
|         |                                                     |                                     |                                                                  | interacts with TRIM5 for polyubiquitination which activates the MAP3K7/ITAK1 complex resulting in expression of NF-kappa-B and MAPK-responsive inflammatory genes                                                                                                                               | TRIM5                                                   | induces inflammatory genes (via NF-kB, MAPK)                                            | by similarity; GO annotations                                                                                                                          |
|         |                                                     |                                     |                                                                  | catalyzes the synthesis of non-canonical 'Lys-63-linked polyubiquitin chains, which does not lead to protein degradation by the proteasome                                                                                                                                                      | various proteins                                        |                                                                                         | Cardamone et al. Mol Cell. 2012;46(1):91-104; Lenziucci. J Biol Chem. 2017;292(7):2754-2772.                                                           |
| UBE2V2  | ubiquitin-conjugating enzyme E2 variant 2           | nucleus                             | DNA damage & repair                                              | plays a role in error-free DNA repair                                                                                                                                                                                                                                                           |                                                         | pro-survival                                                                            | Franko et al. Biochim Biophys Acta. 2001;1519(1-2):70-7. GO annotations                                                                                |
|         |                                                     |                                     |                                                                  | has no ubiquitin ligase activity on its own; forms UBE2V2/UBE2N heterodimer to catalyze 'Lys-63-linked poly-ubiquitination chains, which does not lead to protein degradation by the proteasome                                                                                                 | UBE2N, various proteins                                 |                                                                                         | GO annotations                                                                                                                                         |
|         |                                                     |                                     |                                                                  | plays a role in regulating cell cycle progression                                                                                                                                                                                                                                               |                                                         |                                                                                         |                                                                                                                                                        |

Differentially abundant proteins with fold change (FC) values |FC| ≥ 3 were subjected to enrichment analysis using Gene Ontology (GO) terms (<http://geneontology.org/>).

Based on GO annotations, all proteins that were associated with DNA damage & repair and related cellular functions were used in the pathway analysis.

Accordingly, the table features only protein functions that are relevant for DNA damage recognition & repair and related cellular functions.

Additional functions in normal cell physiology may thus be omitted for clarity.

Protein functions were adapted from Uniprot ([www.uniprot.org](http://www.uniprot.org/)) and GO annotations (<http://geneontology.org/>); reference by similarity was taken from Uniprot ([www.uniprot.org](http://www.uniprot.org/)).
